# Supplementary material for: Structural properties of [Cu(ii)3L6] cages: bridged polyatomic anion effects on unprecedented efficiency of heterogeneous catechol oxidation
Source: Royal Society of Chemistry journal article supplement (doi:10.1039/d2dt00500j), 2022-01-01
Supplement: d2dt00500j1.pdf [file d2dt00500j1.pdf]

<Electronic Supplementary Information>

**Structural properties of [Cu(II)<sub>3</sub>L<sub>6</sub>] cages: bridged polyatomic anion effects on  
unprecedented efficiency of heterogeneous catechol oxidation**

Doheon Kim, Geonwoo Gwak, Jihun Han, Dongwon Kim, and Ok-Sang Jung\*

Department of Chemistry, Pusan National University, Busan 46241, Republic of Korea Fax: (+82) 51-5163522;

Tel: (+82) 51-5103240; E-mail: oksjung@pusan.ac.kr

**Table S1** Selected bond lengths and angles

| SiF <sub>6</sub> @[Cu <sub>3</sub> L <sub>6</sub> ](μ <sub>2</sub> -SiF <sub>6</sub> ) <sub>1.5</sub> (BF <sub>4</sub> )-6MeOH |           | SiF <sub>6</sub> @[Cu <sub>3</sub> L <sub>6</sub> ](μ <sub>2</sub> -SiF <sub>6</sub> ) <sub>1.5</sub> (ClO <sub>4</sub> )-6MeOH |          | SiF <sub>6</sub> @[Cu <sub>3</sub> L <sub>6</sub> ](SbF <sub>6</sub> ) <sub>4</sub> |           | PF <sub>6</sub> @[Cu <sub>3</sub> L <sub>6</sub> (MeOH) <sub>3</sub> ](PF <sub>6</sub> ) <sub>5</sub> ·2MeOH |            |
|--------------------------------------------------------------------------------------------------------------------------------|-----------|---------------------------------------------------------------------------------------------------------------------------------|----------|-------------------------------------------------------------------------------------|-----------|--------------------------------------------------------------------------------------------------------------|------------|
| Cu(1)-N(1)                                                                                                                     | 1.989(9)  | Cu(1)-N(2A)                                                                                                                     | 1.989(5) | Cu(1)-N(13)                                                                         | 1.973(11) | Cu(1)-N(1F)                                                                                                  | 2.009(5)   |
| Cu(1)-N(3)                                                                                                                     | 1.997(9)  | Cu(1)-N(1B)                                                                                                                     | 2.012(5) | Cu(1)-N(10)                                                                         | 1.992(12) | Cu(1)-N(2C)                                                                                                  | 2.023(5)   |
| Cu(1)-N(4) <sup>#1</sup>                                                                                                       | 2.020(10) | Cu(1)-N(1A) <sup>#1</sup>                                                                                                       | 2.021(5) | Cu(1)-N(12)                                                                         | 1.997(10) | Cu(1)-N(2A)                                                                                                  | 2.041(4)   |
| Cu(1)-N(2) <sup>#2</sup>                                                                                                       | 2.026(10) | Cu(1)-N(2B) <sup>#2</sup>                                                                                                       | 2.023(5) | Cu(1)-N(11)                                                                         | 2.017(11) | Cu(1)-N(2D)                                                                                                  | 2.045(5)   |
| Cu(1)-F(3J)                                                                                                                    | 2.35(4)   | Cu(1)-F(5) <sup>#3</sup>                                                                                                        | 2.393(5) | Cu(1)-F(12)                                                                         | 2.368(12) | Cu(1)-O(2)                                                                                                   | 2.293(5)   |
| Cu(1)-F(4I)                                                                                                                    | 2.37(5)   |                                                                                                                                 |          |                                                                                     |           |                                                                                                              |            |
|                                                                                                                                |           | N(2A)-Cu(1)-N(1B)                                                                                                               | 177.6(3) | N(13)-Cu(1)-N(10)                                                                   | 170.6(6)  | N(1F)-Cu(1)-N(2C)                                                                                            | 178.5(2)   |
| N(1)-Cu(1)-N(3)                                                                                                                | 178.5(4)  | N(2A)-Cu(1)-N(1A) <sup>#1</sup>                                                                                                 | 88.2(3)  | N(13)-Cu(1)-N(12)                                                                   | 90.1(6)   | N(1F)-Cu(1)-N(2A)                                                                                            | 90.10(17)  |
| N(1)-Cu(1)-N(4) <sup>#1</sup>                                                                                                  | 90.4(4)   | N(1B)-Cu(1)-N(1A) <sup>#1</sup>                                                                                                 | 91.1(3)  | N(10)-Cu(1)-N(12)                                                                   | 89.0(6)   | N(2C)-Cu(1)-N(2A)                                                                                            | 89.68(17)  |
| N(3)-Cu(1)-N(2) <sup>#2</sup>                                                                                                  | 91.2(4)   | N(2A)-Cu(1)-N(2B) <sup>#2</sup>                                                                                                 | 91.9(3)  | N(13)-Cu(1)-N(11)                                                                   | 88.2(6)   | N(1F)-Cu(1)-N(2D)                                                                                            | 88.95(18)  |
| N(4) <sup>#1</sup> -Cu(1)-N(2) <sup>#2</sup>                                                                                   | 174.0(4)  | N(1B)-Cu(1)-N(2B) <sup>#2</sup>                                                                                                 | 89.1(3)  | N(10)-Cu(1)-N(11)                                                                   | 93.1(6)   | N(2C)-Cu(1)-N(2D)                                                                                            | 90.89(19)  |
| N(4) <sup>#1</sup> -Cu(1)-F(3J)                                                                                                | 85.4(11)  | N(1A) <sup>#1</sup> -Cu(1)-N(2B) <sup>#2</sup>                                                                                  | 173.0(2) | N(12)-Cu(1)-N(11)                                                                   | 176.8(6)  | N(2A)-Cu(1)-N(2D)                                                                                            | 165.93(19) |
| N(2) <sup>#2</sup> -Cu(1)-F(3J)                                                                                                | 88.6(11)  | N(2A)-Cu(1)-F(5) <sup>#3</sup>                                                                                                  | 90.4(3)  | N(13)-Cu(1)-F(12)                                                                   | 96.2(5)   | N(1F)-Cu(1)-O(2)                                                                                             | 90.59(19)  |
| N(1)-Cu(1)-F(4I)                                                                                                               | 95.0(11)  | N(1B)-Cu(1)-F(5) <sup>#3</sup>                                                                                                  | 91.9(3)  | N(10)-Cu(1)-F(12)                                                                   | 93.2(6)   | N(2C)-Cu(1)-O(2)                                                                                             | 90.92(19)  |
| N(3)-Cu(1)-F(4I)                                                                                                               | 86.5(11)  | N(1A) <sup>#1</sup> -Cu(1)-F(5) <sup>#3</sup>                                                                                   | 86.2(2)  | N(12)-Cu(1)-F(12)                                                                   | 94.8(5)   | N(2A)-Cu(1)-O(2)                                                                                             | 94.11(18)  |
| N(4) <sup>#1</sup> -Cu(1)-F(4I)                                                                                                | 88.9(15)  | N(2B) <sup>#2</sup> -Cu(1)-F(5) <sup>#3</sup>                                                                                   | 86.9(2)  | N(11)-Cu(1)-F(12)                                                                   | 82.7(6)   | N(2D)-Cu(1)-O(2)                                                                                             | 99.93(19)  |
| N(2) <sup>#2</sup> -Cu(1)-F(4I)                                                                                                | 85.1(15)  |                                                                                                                                 |          |                                                                                     |           |                                                                                                              |            |

<sup>#1</sup> y, -z+1, -x+1<sup>#1</sup> z, -x+1, -y+1<sup>#2</sup> -z+1, x, -y+1<sup>#2</sup> -y+1, -z+1, x<sup>#3</sup> -x+1, -y, z

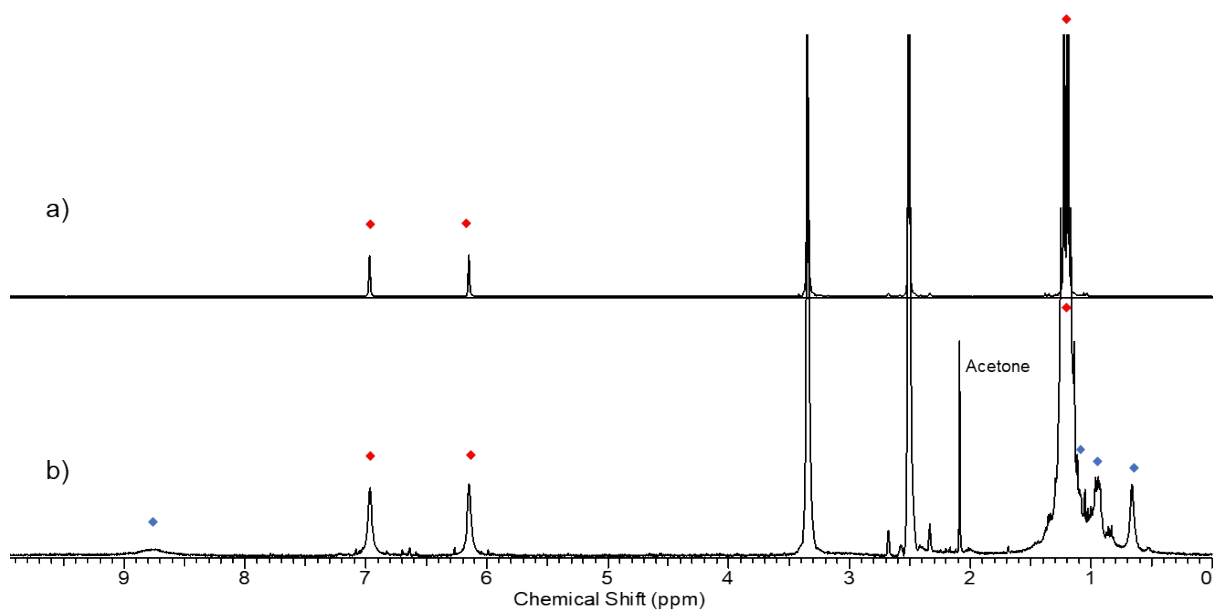

**Fig. S1.** <sup>1</sup>H NMR spectrum of authentic 3,5-di-*tert*-butylorthoquinone (a) in Me<sub>2</sub>SO-*d*<sub>6</sub>. <sup>1</sup>H NMR spectrum in Me<sub>2</sub>SO-*d*<sub>6</sub> after catalysis using SiF<sub>6</sub>@[Cu<sub>3</sub>L<sub>6</sub>](μ<sub>2</sub>-SiF<sub>6</sub>)<sub>1.5</sub>(ClO<sub>4</sub>)·6MeOH in acetone.

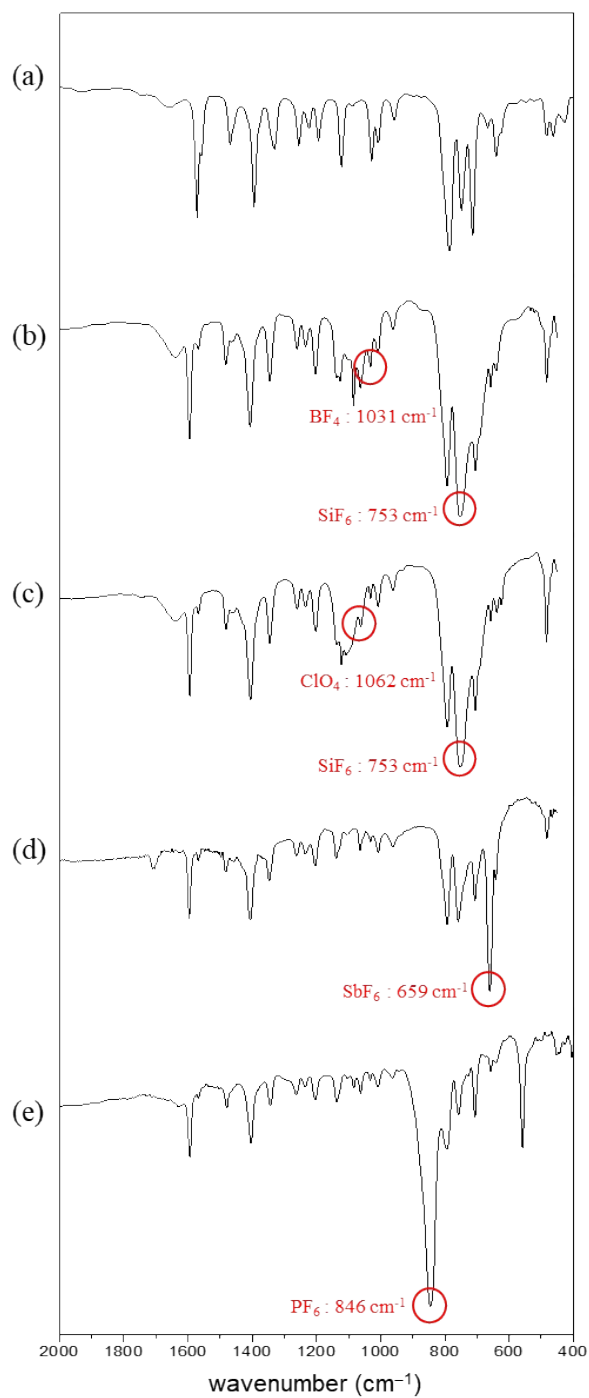

**Fig. S2.** FT-IR spectra of L (a),  $\text{SiF}_6@[\text{Cu}_3\text{L}_6](\mu_2\text{-SiF}_6)_{1.5}(\text{BF}_4)\cdot 6\text{MeOH}$  (b),  $\text{SiF}_6@[\text{Cu}_3\text{L}_6](\mu_2\text{-SiF}_6)_{1.5}(\text{ClO}_4)\cdot 6\text{MeOH}$  (c),  $[\text{Cu}_3(\text{SiF}_6)\text{L}_6](\text{SbF}_6)_4$  (d), and  $\text{PF}_6@[\text{Cu}_3\text{L}_6(\text{MeOH})_3](\text{PF}_6)_5\cdot (\text{MeOH})_2$  (e).

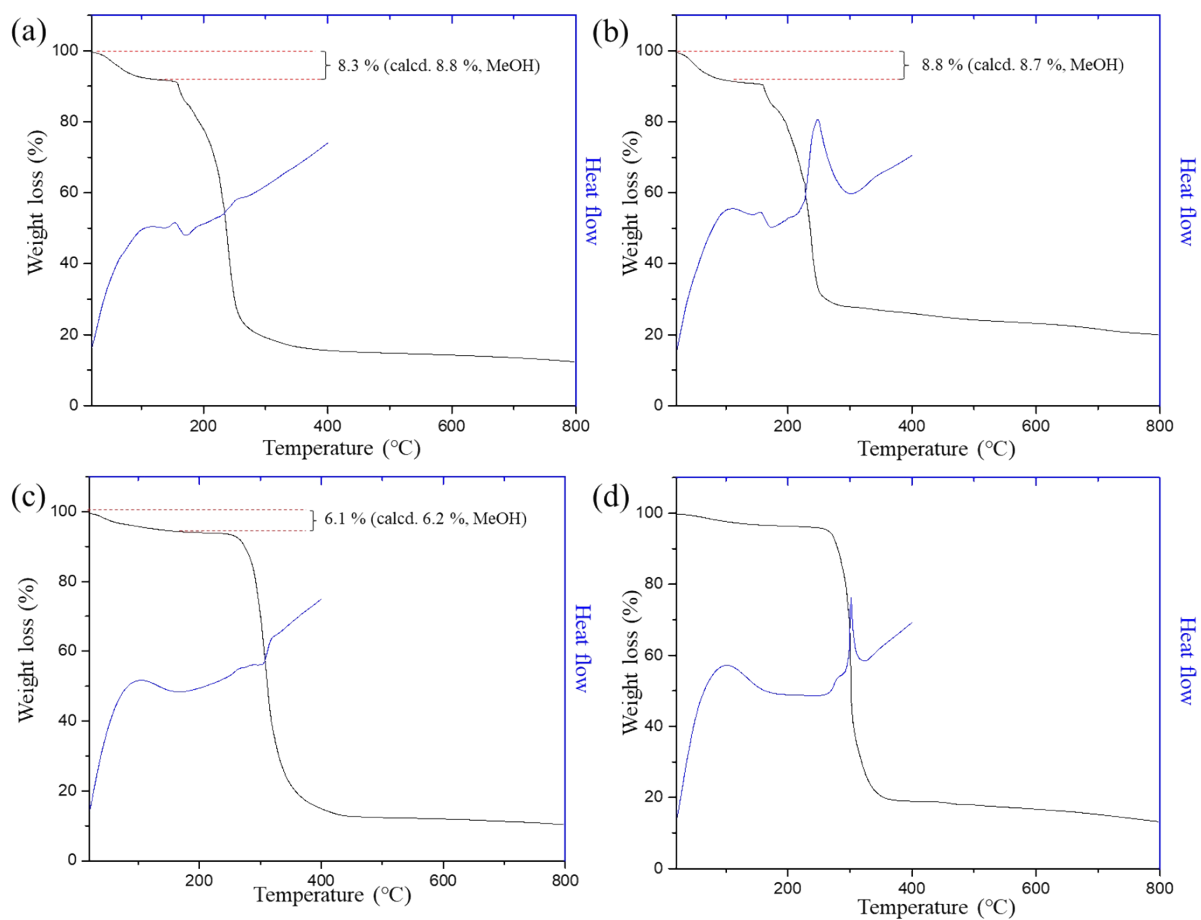

**Fig. S3.** TGA and DSC curves for  $\text{SiF}_6@[\text{Cu}_3\text{L}_6](\mu_2\text{-SiF}_6)_{1.5}(\text{BF}_4)\cdot 6\text{MeOH}$  (a),  $\text{SiF}_6@[\text{Cu}_3\text{L}_6](\mu_2\text{-SiF}_6)_{1.5}(\text{ClO}_4)\cdot 6\text{MeOH}$  (b),  $\text{PF}_6@[\text{Cu}_3\text{L}_6(\text{MeOH})_3](\text{PF}_6)_5\cdot (\text{MeOH})_2$  (c), and  $[\text{Cu}_3(\text{SiF}_6)\text{L}_6](\text{SbF}_6)_4$  (d).

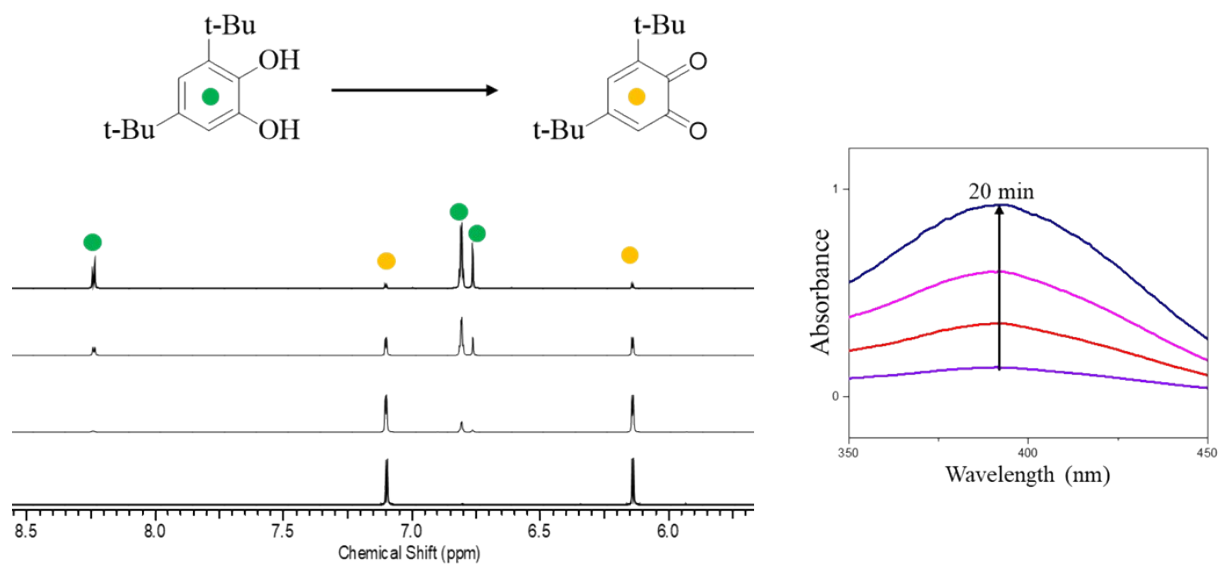

**Fig. S4.** <sup>1</sup>H NMR spectral procedure on catalytic oxidation 3,5-di-*tert*-butylcatechol to 3,5-di-*tert*-butylorthoquinone using SiF<sub>6</sub>@[Cu<sub>3</sub>L<sub>6</sub>](μ<sub>2</sub>-SiF<sub>6</sub>)<sub>1.5</sub>(ClO<sub>4</sub>)·6MeOH in Me<sub>2</sub>CO-*d*<sub>6</sub> (left). UV spectral change during the catalytic reaction (right).

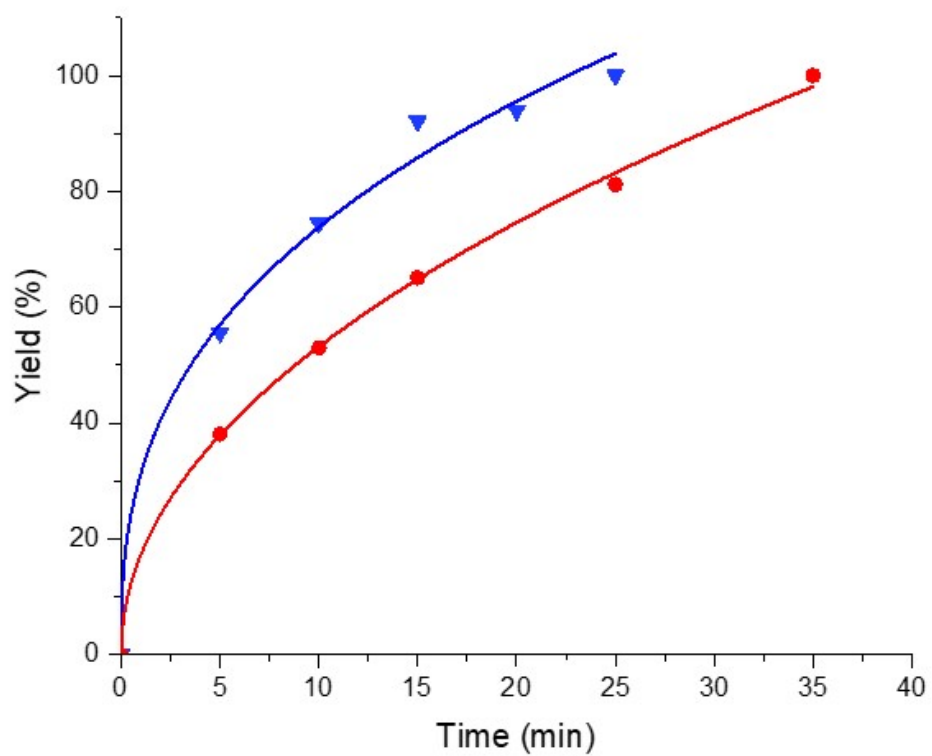

**Fig. S5.** Catalytic oxidation results of 3,5-di-*tert*-butylcatechol using  $\text{SiF}_6@[\text{Cu}_3\text{L}_6](\mu_2\text{-SiF}_6)_{1.5}(\text{ClO}_4)$  in 15 mL acetone (blue line) and in 20 mL acetone (red line).

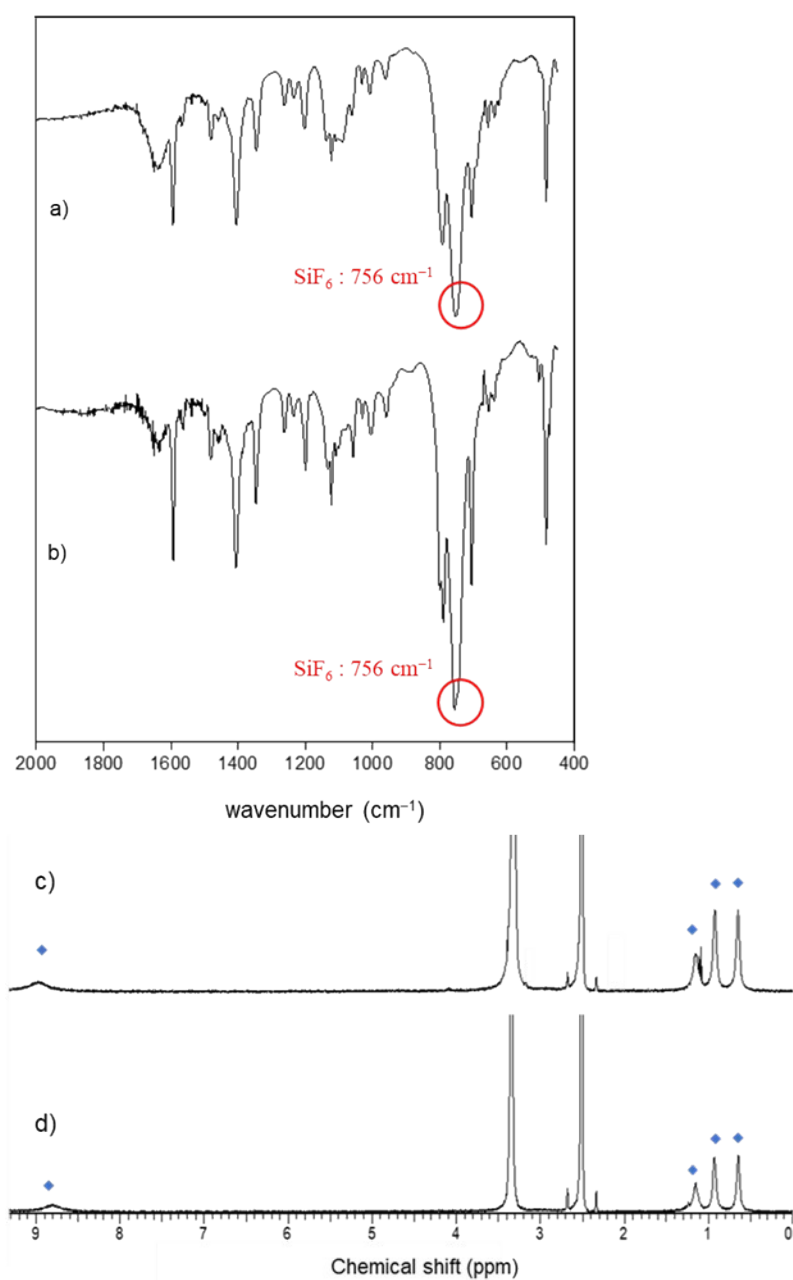

**Fig. S6.** IR spectra of SiF<sub>6</sub>@[Cu<sub>3</sub>L<sub>6</sub>](μ<sub>2</sub>-SiF<sub>6</sub>)<sub>1.5</sub>(ClO<sub>4</sub>)·6MeOH (a) and the recycled crystals after catechol oxidation (b). <sup>1</sup>H NMR spectra of SiF<sub>6</sub>@[Cu<sub>3</sub>L<sub>6</sub>](μ<sub>2</sub>-SiF<sub>6</sub>)<sub>1.5</sub>(ClO<sub>4</sub>)·6MeOH (c) and the recycled crystals after catechol oxidation (d).



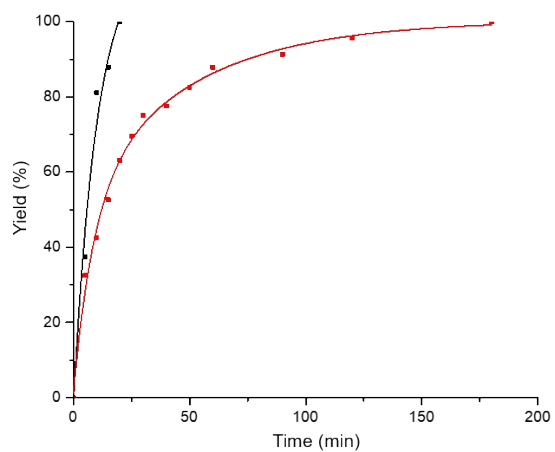

**Fig. S7.** Catalytic oxidation rates of 3,5-di-*tert*-butylcatechol using  $\text{SiF}_6@[\text{Cu}_3\text{L}_6](\mu_2\text{-SiF}_6)_{1.5}(\text{ClO}_4)\cdot 6\text{MeOH}$  (black line) and using the recycled  $\text{SiF}_6@[\text{Cu}_3\text{L}_6](\mu_2\text{-SiF}_6)_{1.5}(\text{ClO}_4)\cdot 6\text{MeOH}$  (red line).

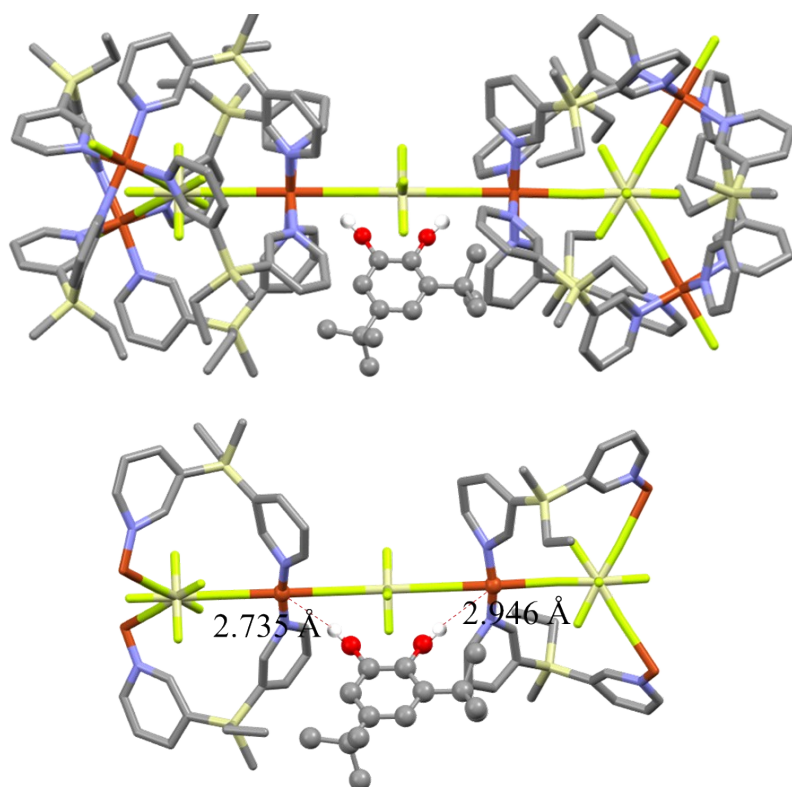

**Fig. S8.** Molecular model of the inter-cage Cu $\cdots$ Cu of heterogeneous 3D catalyst as a catalytic center and 3,5-di-*tert*-butylcatechol (OH $\cdots$ Cu: 2.735 – 2.946 Å).

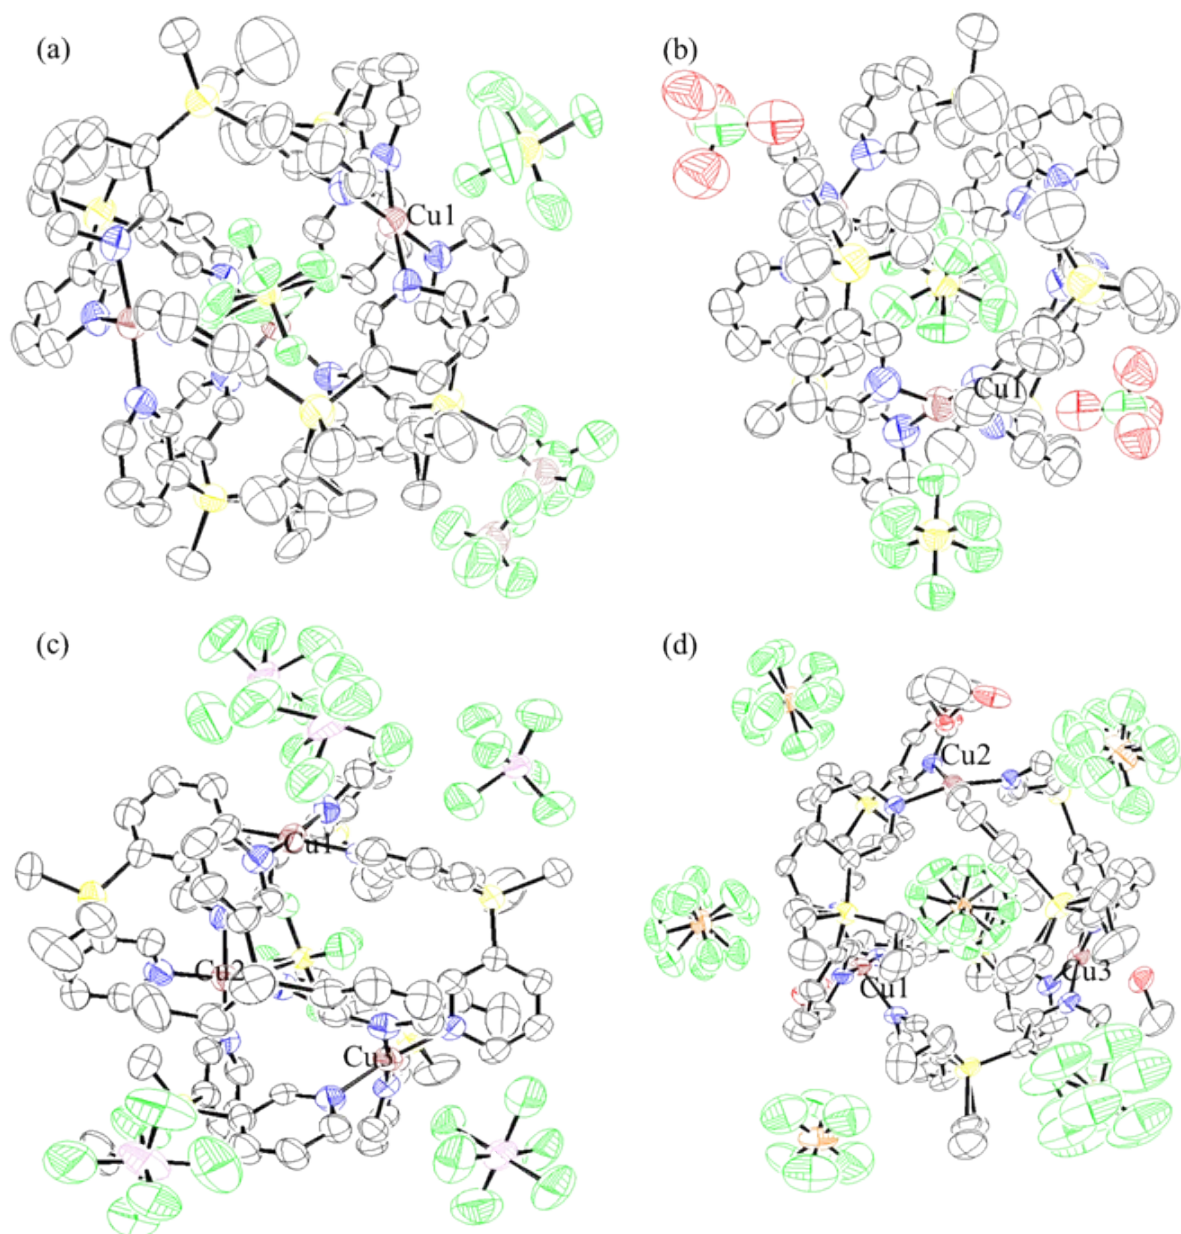

**Fig. S9.** ORTEP drawings of  $\text{SiF}_6@[\text{Cu}_3\text{L}_6](\mu_2\text{-SiF}_6)_{1.5}(\text{BF}_4)\cdot 6\text{MeOH}$  (a),  $\text{SiF}_6@[\text{Cu}_3\text{L}_6](\mu_2\text{-SiF}_6)_{1.5}(\text{ClO}_4)\cdot 6\text{MeOH}$  (b),  $\text{PF}_6@[\text{Cu}_3\text{L}_6(\text{MeOH})_3](\text{PF}_6)_5\cdot (\text{MeOH})_2$  (c), and  $[\text{Cu}_3(\text{SiF}_6)\text{L}_6](\text{SbF}_6)_4$  (d). Hydrogen atoms are omitted for clarity. Ellipsoids are depicted at 50% probability
